# Supplementary material for: “When Is Health Care Actually Going to Be Care?” The Lived Experience of Family Planning Care Among Young Black Women
Source: PubMed Central journal article supplement — Qual Health Res. 2021 Feb 23;31(6):1169–82. doi: 10.1177/1049732321993094 (PMC8114454; doi:10.1177/1049732321993094), 2021-02-23
Supplement: sj-pdf-1-qhr-10.1177_1049732321993094.pdf [file sj-pdf-1-qhr-10.1177_1049732321993094.pdf]

**Table 1***Patient Characteristics and Description of the Visit Context\**

|                                               | <b>Total Sample (n=22)</b> |
|-----------------------------------------------|----------------------------|
| <b>Patient Characteristics</b>                |                            |
| <b>Mean Age in Years (SD)</b>                 | 24 (3.0)                   |
| <b>Socioeconomic Status</b>                   |                            |
| Low                                           | 12 (54%)                   |
| High                                          | 10 (46%)                   |
| <b>Education</b>                              |                            |
| Some college or less                          | 6 (27%)                    |
| College degree or more                        | 16 (73%)                   |
| <b>Health Insurance</b>                       |                            |
| Yes                                           | 20 (91%)                   |
| No                                            | 2 (9%)                     |
| <b>Relationship Status</b>                    |                            |
| Single                                        | 7 (32%)                    |
| In a relationship, not living with partner    | 11 (50%)                   |
| In a relationship, living with partner        | 4 (18%)                    |
| <b>Region of Current Residence</b>            |                            |
| South                                         | 17 (77%)                   |
| Midwest                                       | 2 (9%)                     |
| Central East Coast                            | 3 (14%)                    |
| <b>Visit Context</b>                          |                            |
| Provider Type                                 |                            |
| Nurse or Nurse Midwife                        | 6 (27%)                    |
| Physician Assistant                           | 2 (9%)                     |
| Physician                                     | 14 (64%)                   |
| Facility Type                                 |                            |
| Private                                       | 13 (59%)                   |
| Community health center, public health clinic | 3 (14%)                    |
| University or college clinic                  | 5 (23%)                    |

|                                                         |                 |
|---------------------------------------------------------|-----------------|
| Other                                                   | 1 (4%)          |
| <b>Reactance (Y)</b>                                    | <b>12 (54%)</b> |
| Perceived potential threat to reproductive autonomy     | 12              |
| Experienced negative emotions while talking to provider | 13              |
| Had negative thoughts while talking to provider         | 19              |
| <b>Mean Global Satisfaction Rating (SD)</b>             | <b>7 (2.6)</b>  |

---

\*Data obtained from the online survey.
